# Supplementary material
Source: PubMed Central journal article supplement (PMC3883356)
Supplement: NIHMS539164-supplement-Supplemental_Figure_1.pdf [file NIHMS539164-supplement-Supplemental_Figure_1.pdf]

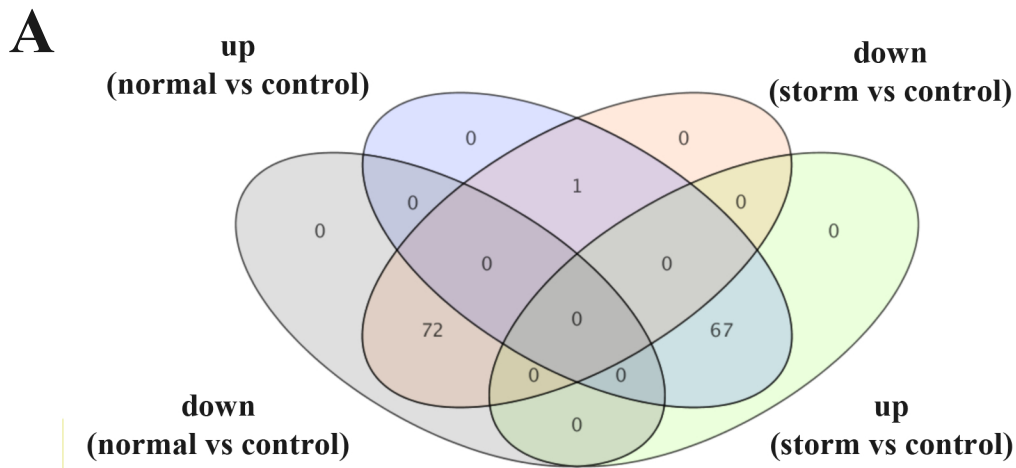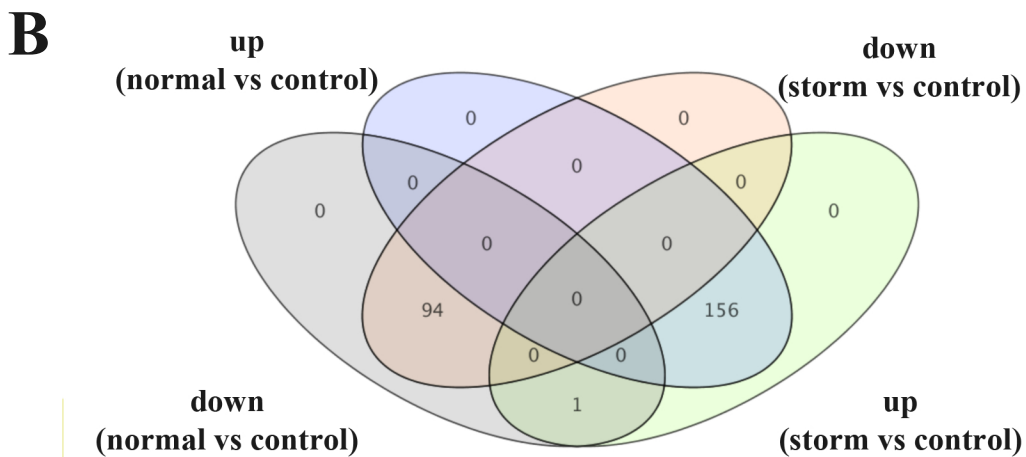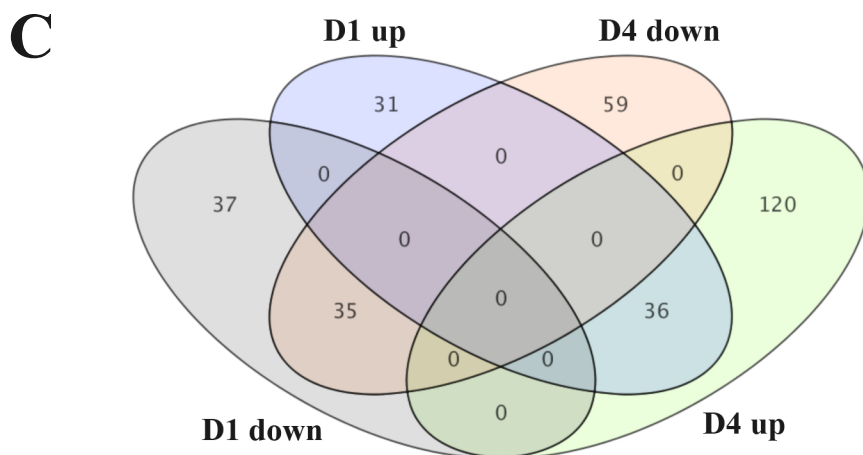

**Supplemental Material, Figure 1.** Venn diagram showing the overlaps of up- or down-regulated entities in different groups. (A) Overlaps of up- or down-regulated entities from normal and storm group in D1. (B) Overlaps of up- or down-regulated entities from normal and storm group in D4. (C) Overlaps of up- or down-regulated entities in D1 and D4. Numbers in the intersection between circles represent the numbers of genes that are commonly changed in two, three, or four conditions.
