# Supplementary material
Source: PubMed Central journal article supplement (PMC3883356)
Supplement: NIHMS539164-supplement-Supplemental_Table_1.pdf [file NIHMS539164-supplement-Supplemental_Table_1.pdf]

**Supplemental Material, Table 1. Complete list of 125 genes differentially expressed more than 1.5-fold in Day 1.**

| Affymetrix Id | Genesymbol | Gene Name                                                                  | Fold Changes |             |
|---------------|------------|----------------------------------------------------------------------------|--------------|-------------|
|               |            |                                                                            | Normal Group | Storm Group |
| 7951271       | MMP1       | matrix metalloproteinase 1 (interstitial collagenase)                      | 6.36         | 4.56        |
| 8021635       | SERPINB2   | serpin peptidase inhibitor, clade B (ovalbumin), member 2                  | 3.92         | 3.21        |
| 7909271       | IL24       | interleukin 24                                                             | 3.50         | 3.43        |
| 8072678       | HMOX1      | heme oxygenase (decycling) 1                                               | 3.03         | 2.23        |
| 8131844       | GNPMB      | glycoprotein (transmembrane) nmb                                           | 2.81         | 2.83        |
| 8128123       | RRAGD      | Ras-related GTP binding D                                                  | 2.68         | 2.69        |
| 8102800       | SLC7A11    | solute carrier family 7, (cationic amino acid transporter, y+ system) memb | 2.53         | 1.65        |
| 8005475       | TRIM16L    | tripartite motif-containing 16-like   tripartite motif-containing 16       | 2.37         | 1.76        |
| 7942123       | CCND1      | cyclin D1                                                                  | 2.12         | 1.82        |
| 8084630       | LOC344887  | NmrA-like family domain containing 1 pseudogene                            | 2.08         | 1.35        |
| 8115851       | STC2       | stanniocalcin 2                                                            | 2.04         | 1.87        |
| 8092578       | ETV5       | ets variant 5                                                              | 2.03         | 1.65        |
| 8064375       | SRXN1      | sulfiredoxin 1                                                             | 2.00         | 1.55        |
| 8093104       | TM4SF19    | transmembrane 4 L six family member 19                                     | 1.97         | 1.90        |
| 7964460       | DDIT3      | DNA-damage-inducible transcript 3                                          | 1.94         | 1.88        |
| 7917779       | GCLM       | glutamate-cysteine ligase, modifier subunit                                | 1.89         | 1.56        |
| 8171435       | PIR        | pirin (iron-binding nuclear protein)                                       | 1.83         | 1.51        |
| 8086517       | CDCP1      | CUB domain containing protein 1                                            | 1.81         | 1.75        |
| 8110569       | SQSTM1     | sequestosome 1                                                             | 1.80         | 1.58        |
| 8012953       | TRIM16     | tripartite motif-containing 16                                             | 1.80         | 1.41        |
| 8085393       | TMEM40     | transmembrane protein 40                                                   | 1.78         | 1.69        |
| 8030171       | FTL        | ferritin, light polypeptide                                                | 1.77         | 1.59        |
| 7951284       | MMP3       | matrix metalloproteinase 3 (stromelysin 1, progelatinase)                  | 1.76         | 1.47        |
| 7995825       | MT1F       | metallothionein 1F                                                         | 1.76         | 1.72        |
| 7956867       | HMGA2      | high mobility group AT-hook 2                                              | 1.73         | 1.50        |
| 8002303       | NQO1       | NAD(P)H dehydrogenase, quinone 1                                           | 1.73         | 1.47        |
| 7971461       | LCP1       | lymphocyte cytosolic protein 1 (L-plastin)                                 | 1.72         | 1.58        |
| 8005134       | ADORA2B    | adenosine A2b receptor                                                     | 1.71         | 1.57        |
| 8146934       | LY96       | lymphocyte antigen 96                                                      | 1.71         | 1.60        |
| 8154381       | C9orf150   | chromosome 9 open reading frame 150                                        | 1.71         | 1.61        |
| 8114787       | GNPDA1     | glucosamine-6-phosphate deaminase 1                                        | 1.69         | 1.68        |
| 7938702       | B7H6       | B7 homolog 6                                                               | 1.67         | 1.76        |
| 7902452       | AK5        | adenylate kinase 5                                                         | 1.67         | 1.49        |
| 7957298       | NAV3       | neuron navigator 3                                                         | 1.64         | 1.33        |
| 8017843       | SLC16A6    | solute carrier family 16, member 6 (monocarboxylic acid transporter 7)     | 1.63         | 1.51        |
| 8121510       | RPF2       | ribosome production factor 2 homolog (S. cerevisiae)                       | 1.63         | 1.51        |
| 7909441       | G0S2       | G0/G1switch 2                                                              | 1.60         | 1.38        |
| 8178676       | NEU1       | sialidase 1 (lysosomal sialidase)                                          | 1.60         | 1.70        |
| 7916282       | LRP8       | low density lipoprotein receptor-related protein 8, apolipoprotein e recep | 1.59         | 1.36        |
| 7995838       | MT1X       | metallothionein 1X                                                         | 1.59         | 1.67        |
| 7909494       | SYT14      | synaptotagmin XIV                                                          | 1.58         | 1.69        |
| 8059642       | SLC16A14   | solute carrier family 16, member 14 (monocarboxylic acid transporter 14)   | 1.58         | 1.60        |
| 8019796       | MAFG       | v-maf musculoaponeurotic fibrosarcoma oncogene homolog G (avian)           | 1.57         | 1.39        |
| 8128565       | POPDC3     | popeye domain containing 3                                                 | 1.57         | 1.37        |
| 8022176       | LAMA1      | laminin, alpha 1                                                           | 1.56         | 1.43        |
| 8030128       | PPP1R15A   | protein phosphatase 1, regulatory (inhibitor) subunit 15A                  | 1.55         | 1.52        |
| 8005603       | SLC47A1    | solute carrier family 47, member 1                                         | 1.54         | 1.40        |
| 8064904       | FERMT1     | fermitin family member 1                                                   | 1.54         | 1.47        |
| 8084206       | B3GNT5     | UDP-GlcNAc:betaGal beta-1,3-N-acetylglucosaminyltransferase 5              | 1.51         | 1.43        |
| 7958174       | TXNRD1     | thioredoxin reductase 1                                                    | 1.51         | 1.26        |
| 7915160       | RRAGC      | Ras-related GTP binding C                                                  | 1.50         | 1.51        |
| 8013071       | FLCN       | folliculin                                                                 | 1.49         | 1.50        |
| 8013068       | PLD6       | phospholipase D family, member 6                                           | 1.48         | 1.54        |
| 8167603       | CLCN5      | chloride channel 5                                                         | 1.47         | 1.51        |

|         |              |                                                                           |       |       |
|---------|--------------|---------------------------------------------------------------------------|-------|-------|
| 8051583 | CYP1B1       | cytochrome P450, family 1, subfamily B, polypeptide 1                     | 1.45  | 1.71  |
| 8113914 | FNIP1        | folliculin interacting protein 1                                          | 1.45  | 1.52  |
| 7938890 | PRMT3        | protein arginine methyltransferase 3                                      | 1.42  | 1.51  |
| 8021301 | RAB27B       | RAB27B member RAS oncogene family                                         | 1.34  | 1.74  |
| 7962559 | SLC38A4      | solute carrier family 38, member 4                                        | -1.31 | -1.52 |
| 8175261 | MIR503       | microRNA 503                                                              | -1.40 | -1.59 |
| 7987315 | ACTC1        | actin, alpha, cardiac muscle 1                                            | -1.45 | -1.52 |
| 7896761 | SAMD11       | sterile alpha motif domain containing 11                                  | -1.47 | -1.53 |
| 8009334 | CACNG4       | calcium channel, voltage-dependent, gamma subunit 4                       | -1.49 | -1.54 |
| 8045664 | LYPD6B       | LY6/PLAUR domain containing 6B                                            | -1.50 | -1.51 |
| 7986383 | IGF1R        | insulin-like growth factor 1 receptor                                     | -1.50 | -1.42 |
| 7933312 | ANXA8L1      | annexin A8-like 1                                                         | -1.50 | -1.49 |
| 8154563 | ACER2        | alkaline ceramidase 2                                                     | -1.51 | -1.32 |
| 8139500 | TNS3         | tensin 3                                                                  | -1.51 | -1.33 |
| 8055323 | NCKAP5       | NCK-associated protein 5                                                  | -1.52 | -1.43 |
| 8089112 | FILIP1L      | filamin A interacting protein 1-like                                      | -1.52 | -1.44 |
| 8157802 | MIR181B2     | microRNA 181b-2                                                           | -1.52 | -1.29 |
| 7988467 | FBN1         | fibrillin 1                                                               | -1.54 | -1.46 |
| 7954065 | GPRC5A       | G protein-coupled receptor, family C, group 5, member A                   | -1.54 | -1.46 |
| 7961142 | OLR1         | oxidized low density lipoprotein (lectin-like) receptor 1                 | -1.54 | -1.46 |
| 7927732 | ARID5B       | AT rich interactive domain 5B (MRF1-like)                                 | -1.54 | -1.47 |
| 8141477 | GATS         | GATS protein                                                              | -1.55 | -1.55 |
| 7977046 | TNFAIP2      | tumor necrosis factor, alpha-induced protein 2                            | -1.55 | -1.40 |
| 7958262 | TCP11L2      | t-complex 11 (mouse)-like 2                                               | -1.55 | -1.49 |
| 7905929 | EFNA1        | ephrin-A1                                                                 | -1.56 | -1.23 |
| 8005043 | FLJ34690     | uncharacterized protein FLJ34690                                          | -1.56 | -1.31 |
| 7916584 | TACSTD2      | tumor-associated calcium signal transducer 2                              | -1.56 | -1.33 |
| 8131719 | DNAH11       | dynein, axonemal, heavy chain 11                                          | -1.58 | -1.61 |
| 8114900 | PPP2R2B      | protein phosphatase 2, regulatory subunit B, beta                         | -1.58 | -1.54 |
| 7971015 | SMAD9        | SMAD family member 9                                                      | -1.59 | -1.60 |
| 7902235 | LRRC7        | leucine rich repeat containing 7                                          | -1.59 | -1.23 |
| 7983527 | SEMA6D       | sema domain, transmembrane domain (TM), and cytoplasmic domain, (se       | -1.60 | -1.30 |
| 7913655 | ID3          | inhibitor of DNA binding 3, dominant negative helix-loop-helix protein    | -1.60 | -1.57 |
| 7952577 | KIRREL3      | kin of IRRE like 3 (Drosophila)                                           | -1.60 | -1.60 |
| 8165334 | CLIC3        | chloride intracellular channel 3                                          | -1.60 | -1.59 |
| 7976012 | NRXN3        | neurexin 3                                                                | -1.61 | -1.54 |
| 8160452 | CDKN2B       | cyclin-dependent kinase inhibitor 2B (p15, inhibits CDK4)                 | -1.61 | -1.46 |
| 7915910 | PDZK1IP1     | PDZK1 interacting protein 1                                               | -1.61 | -1.59 |
| 8156571 | MIR27B       | microRNA 27b                                                              | -1.62 | -1.32 |
| 8074780 | YPEL1        | yippee-like 1                                                             | -1.63 | -1.65 |
| 7932765 | MPP7         | membrane protein, palmitoylated 7 (MAGUK p55 subfamily member 7)          | -1.64 | -1.50 |
| 8008627 | NOG          | noggin                                                                    | -1.66 | -1.58 |
| 7938758 | SAA1         | serum amyloid A1                                                          | -1.67 | -1.22 |
| 7926875 | BAMBI        | BMP and activin membrane-bound inhibitor homolog (Xenopus laevis)         | -1.68 | -1.48 |
| 7951140 | LOC100131541 | uncharacterized Loc100131541                                              | -1.68 | -1.34 |
| 7908793 | ELF3         | E74-like factor 3 (ets domain transcription factor, epithelial-specific ) | -1.71 | -1.35 |
| 8102831 | C4orf49      | chromosome 4 open reading frame 49                                        | -1.71 | -1.52 |
| 8115397 | C5orf4       | chromosome 5 open reading frame 4                                         | -1.72 | -1.83 |
| 7999909 | GPRC5B       | G protein-coupled receptor, family C, group 5, member B                   | -1.76 | -1.58 |
| 7955613 | KRT7         | keratin 7                                                                 | -1.78 | -1.81 |
| 8103415 | FAM198B      | family with sequence similarity 198, member B                             | -1.79 | -1.54 |
| 8175666 | GABRE        | gamma-aminobutyric acid (GABA) A receptor, epsilon                        | -1.80 | -1.57 |
| 8133540 | GATSL1       | GATS protein-like 1                                                       | -1.80 | -1.74 |
| 7912520 | NPPB         | natriuretic peptide B                                                     | -1.80 | -1.77 |
| 8061564 | ID1          | inhibitor of DNA binding 1, dominant negative helix-loop-helix protein    | -1.81 | -1.76 |
| 7953936 | C12orf59     | chromosome 12 open reading frame 59                                       | -1.81 | -1.68 |
| 8059279 | EPHA4        | EPH receptor A4                                                           | -1.81 | -1.57 |
| 8152512 | TNFRSF11B    | tumor necrosis factor receptor superfamily, member 11b                    | -1.82 | -2.09 |

|         |          |                                                                        |       |       |
|---------|----------|------------------------------------------------------------------------|-------|-------|
| 8131666 | ITGB8    | integrin, beta 8                                                       | -1.83 | -1.61 |
| 8115099 | PDGFRB   | platelet-derived growth factor receptor, beta polypeptide              | -1.88 | -1.71 |
| 7945232 | ADAMTS15 | ADAM metalloproteinase with thrombospondin type 1 motif, 15            | -1.89 | -1.66 |
| 8040103 | ID2      | inhibitor of DNA binding 2, dominant negative helix-loop-helix protein | -1.89 | -1.65 |
| 7984353 | SMAD6    | SMAD family member 6                                                   | -1.98 | -1.87 |
| 8092169 | TNFSF10  | tumor necrosis factor (ligand) superfamily, member 10                  | -2.03 | -1.65 |
| 7979241 | BMP4     | bone morphogenetic protein 4                                           | -2.06 | -1.71 |
| 7976567 | BDKRB1   | bradykinin receptor B1                                                 | -2.18 | -2.17 |
| 8101429 | PLAC8    | placenta-specific 8                                                    | -2.18 | -1.98 |
| 8043244 | ATOH8    | atonal homolog 8 (Drosophila)                                          | -2.26 | -1.90 |
| 8139488 | IGFBP3   | insulin-like growth factor binding protein 3                           | -2.27 | -2.36 |
| 8146863 | SULF1    | sulfatase 1                                                            | -2.28 | -2.19 |
| 7980485 | DIO2     | deiodinase, iodothyronine, type II                                     | -4.19 | -3.61 |
