# Supplementary material
Source: PubMed Central journal article supplement (PMC3883356)
Supplement: NIHMS539164-supplement-Supplemental_Table_5.pdf [file NIHMS539164-supplement-Supplemental_Table_5.pdf]

Supplemental Material, Table 5. Top networks in genes differentially expressed in Day 4

|   | Top Functions                                                                                          | Molecules in Network <sup>a</sup>                                                                                                                                                                                                                                                                                                                                                                                                                                                                                                                                            | Score <sup>b</sup> | Focus Molecule |
|---|--------------------------------------------------------------------------------------------------------|------------------------------------------------------------------------------------------------------------------------------------------------------------------------------------------------------------------------------------------------------------------------------------------------------------------------------------------------------------------------------------------------------------------------------------------------------------------------------------------------------------------------------------------------------------------------------|--------------------|----------------|
| 1 | Lipid Metabolism, Small Molecule Biochemistry, Vitamin and Mineral Metabolism                          | ↑ <b>ABCA1</b> , ↑ <b>ABCG2</b> , ↑ <b>ACSL3</b> , ↑ <b>AKR1C3</b> , ↑ <b>AKR1C1/AKR1C2</b> , ↑ <b>ALAS1</b> , ↓ <b>ANGPTL4</b> , ↑ <b>B3GNT5</b> , CPT1, ↓ <b>DIO2</b> , ↑ <b>ENPP1</b> , ↑ <b>FASN</b> , ↑ <b>G0S2</b> , ↑ <b>GLRX</b> , ↑ <b>GSR</b> , ↑ <b>HDAC9</b> , HDL, HDL-cholesterol, ↑ <b>INSIG1</b> , ↓ <b>KCND3</b> , LDL-cholesterol, ↑ <b>LSS</b> , ↑ <b>LY96 (includes EG:17087)</b> , ↑ <b>ME1</b> , N-cor, NCOR-LXR-Oxysterol-RXR-9 cis RA, NFkB (complex), Nr1h, ↓ <b>PDZK1IP1</b> , PI3K (family), Rxr, SAA, ↑ <b>SCD</b> , ↑ <b>STARD4</b> , T3-TR-RXR | 43                 | 21             |
| 2 | Cellular Movement, Cellular Growth and Proliferation, Nervous System Development and Function          | ↓ <b>ADM</b> , Alp, Alpha catenin, ↑ <b>ARHGEF6</b> , ↑ <b>CBLB</b> , ↑ <b>FOSL1</b> , ↓ <b>FRY</b> , hemoglobin, HMG CoA synthase, ↑ <b>HMGCS1</b> , ↑ <b>IDI1</b> , JUN/JUNB/JUND, ↓ <b>KIT</b> , ↓ <b>LAMA4</b> , LDL, ↑ <b>LDLR</b> , ↑ <b>LRP8</b> , LRP, ↑ <b>MSMO1</b> , NFkb (family), ↓ <b>NPPB</b> , ↑ <b>NQO1</b> , ↑ <b>OSBPL6</b> , PDGF BB, PI3K (complex), Pro-inflammatory Cytokine, ↓ <b>PTX3</b> , ↑ <b>RAB27B</b> , ↑ <b>SERPINB2</b> , ↑ <b>SERPINE2</b> , ↑ <b>SNAI2</b> , Sod, ↑ <b>STEAP2</b> , ↓ <b>TNFRSF11B</b> , trypsin                          | 34                 | 18             |
| 3 | Cardiovascular System Development and Function, Cellular Movement, Tumor Morphology                    | ↑ <b>ADAM12</b> , Akt, ↓ <b>ARID5B</b> , ↑ <b>CD68</b> , ↓ <b>COL8A1</b> , collagen, Collagen type I, Collagen type III, Collagen type IV, Collagen(s), ↑ <b>CTSL1</b> , ↓ <b>EDIL3</b> , Fibrin, Fibrinogen, ↓ <b>FN1</b> , ↓ <b>IGFBP3</b> , ↓ <b>IGFBP7</b> , Igfbp, Integrin, Integrin alpha V beta 3, ↓ <b>ITGB4</b> , ↓ <b>ITGB8</b> , Laminin, ↑ <b>MMP16</b> , ↑ <b>MMP1 (includes EG:300339)</b> , Notch, ↑ <b>NUPR1</b> , Pdgf (complex), ↓ <b>PLAC8</b> , ↑ <b>SERPINB5</b> , ↓ <b>TAGLN</b> , Tgf beta, ↓ <b>THBS1</b> , ↓ <b>THBS2</b> , ↑ <b>TIMP4</b>         | 23                 | 13             |
| 4 | Cellular Development, Cellular Growth and Proliferation, Hematological System Development and Function | ADCY, Ap1, ↓ <b>BMP4</b> , Cpla2, ↑ <b>CYP1B1</b> , ↓ <b>DHRS3</b> , ↑ <b>DOCK10</b> , ↑ <b>EPHX1</b> , estrogen receptor, FSH, ↑ <b>GAL</b> , Growth hormone, hCG, ↑ <b>HSD17B7</b> , ↓ <b>ID2</b> , ↑ <b>IDH1</b> , IL1, Interferon alpha, Jnk, ↑ <b>KITLG</b> , ↓ <b>LBH</b> , Lh, ↑ <b>MME</b> , ↑ <b>MT1X</b> , ↓ <b>MXD3</b> , Nfat (family), p85 (pik3r), ↑ <b>PPARG</b> , ↓ <b>SMAD6</b> , Smad, STAT5a/b, ↑ <b>STEAP1</b> , ↑ <b>TNIK</b> , ↑ <b>TOX</b> , ↑ <b>UPP1</b>                                                                                            | 21                 | 12             |
| 5 | Cell Morphology, Nervous System Development and Function, Cell Death                                   | ↓ <b>ADAMTS5</b> , BCR, ↑ <b>CCL26</b> , ↓ <b>CFB*</b> , Collagen Alpha1, ↑ <b>CTH</b> , ↑ <b>DHCR7</b> , ↑ <b>DHCR7</b> , ↑ <b>DPP4</b> , Eotaxin, ERK1/2, ↑ <b>GDNF</b> , ↓ <b>GFRA1</b> , Gm-csf, Hspg, ↓ <b>IFITM1</b> , Iga, Ige, IgG1, Igg3, IgG, IgG2a, IgG2b, ↑ <b>IL24</b> , Immunoglobulin, ↑ <b>LPXN</b> , ↑ <b>PPIF</b> , ↑ <b>PTPN22</b> , Rsk, Smad1/5/8, ↓ <b>SULF1</b> , ↓ <b>TACSTD2</b> , ↑ <b>TNFRSF9</b> , ↑ <b>TNFRSF21</b> , ↑ <b>TRIM16</b> , Vla-4gamma, ↑ <b>SERPINB2</b> , Sos, STAT5a/b, ↓ <b>TACSTD2</b> , TCR, Tnf, Vegf                        | 21                 | 12             |

a. Differentially expressed genes identified by microarray analysis were listed in bold. The arrows ↑ and ↓ indicated up- or down-regulation.

b. A score of > 3 was considered significant (p < 0.0001).
